# Supplementary material for: Insights into electron dynamics in two-dimensional bismuth oxyselenide: a monolayer-bilayer perspective
Source: Royal Society of Chemistry journal article supplement (doi:10.1039/d3cp05357a), 2024-01-01
Supplement: d3cp05357a1.pdf [file d3cp05357a1.pdf]

*Supporting Information*

**Insights into Electron Dynamics in Two-Dimensional Bismuth  
Oxyselenide: A Monolayer-Bilayer Perspective**

Cuifan Chen, Zhi Yang, Ruiping Liu, Lin Xue,\* and Li-Chun Xu\*

*College of Physics, Taiyuan University of Technology, Jinzhong 030600, China*

E-mail: xuelin@tyut.edu.cn; xulichun@tyut.edu.cn

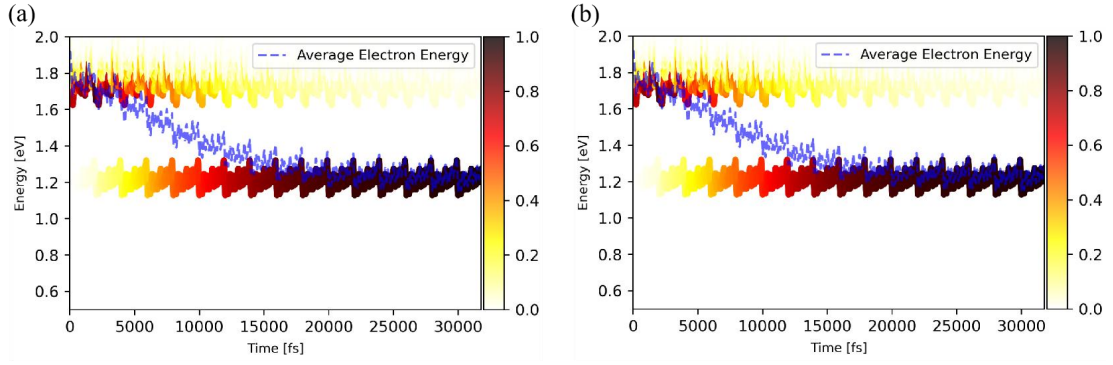

**Figure S1.** Time-dependent electron energy change of monolayer  $\text{Bi}_2\text{O}_2\text{Se}$  for (a) 100 samples and (b) 300 samples.

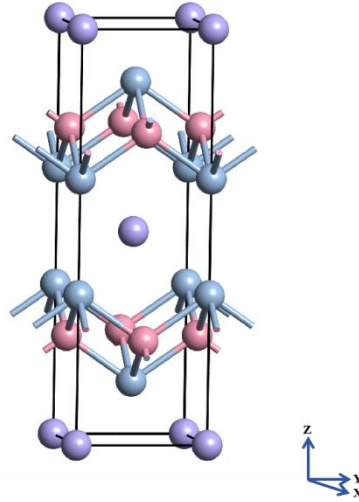

**Figure S2.** Schematic view of the structure of the bulk  $\text{Bi}_2\text{O}_2\text{Se}$ .

**Table S1.** Lattice parameters of monolayer and bilayer  $\text{Bi}_2\text{O}_2\text{Se}$ .

| Lattice parameters | a       | b       | c        | alpha   | beta    | gamma   |
|--------------------|---------|---------|----------|---------|---------|---------|
| Monolayer          | 3.92306 | 3.92306 | 20.00000 | 90.0000 | 90.0000 | 90.0000 |
| Bilayer            | 3.92306 | 3.92306 | 40.00000 | 90.0000 | 90.0000 | 90.0000 |

**Table S2.** Electron effective masses for monolayer and bilayer  $\text{Bi}_2\text{O}_2\text{Se}$ .

| Electron effective mass | $m_e^{x^*}$ | $m_e^{y^*}$ |
|-------------------------|-------------|-------------|
| Monolayer               | 0.17 $m_0$  | 0.17 $m_0$  |
| Bilayer                 | 0.12 $m_0$  | 0.12 $m_0$  |

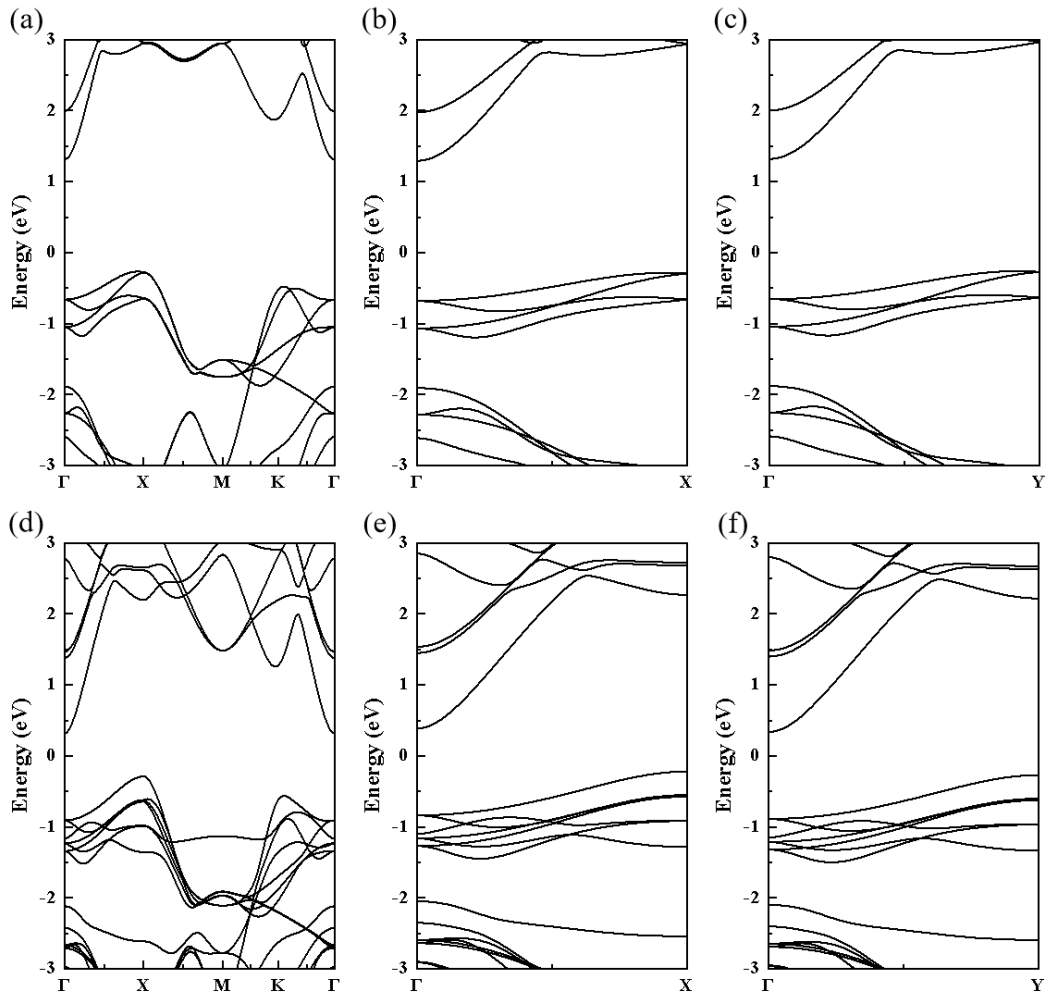

**Figure S3.** Band structures of (a-c) monolayer and (d-f) bilayer  $\text{Bi}_2\text{O}_2\text{Se}$  under different k-point paths.

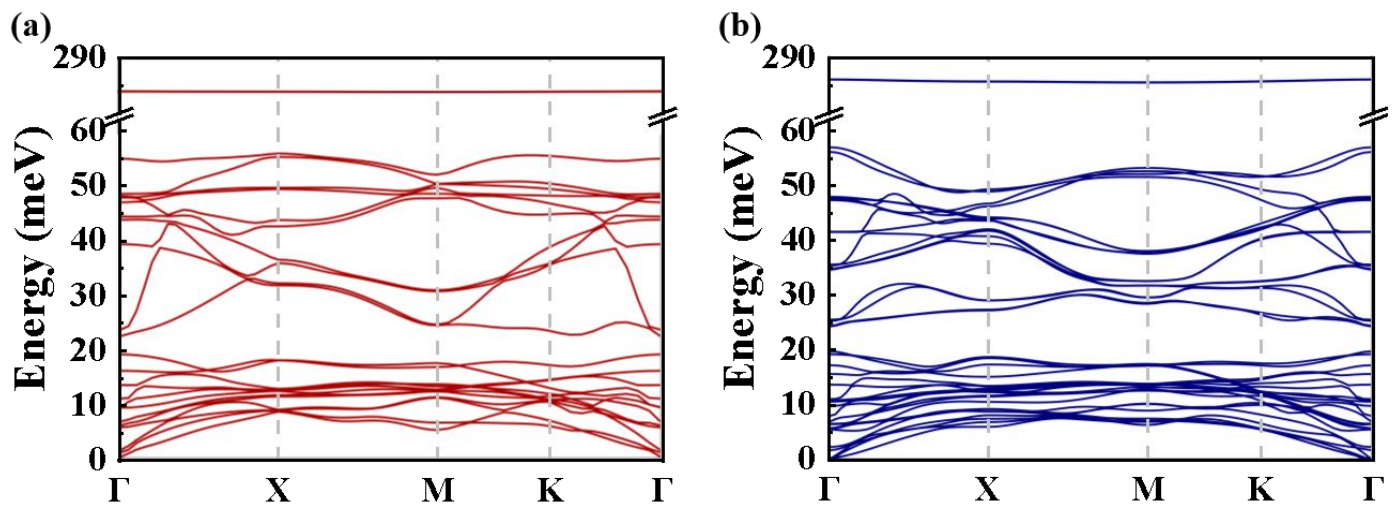

**Figure S4.** Phonon dispersions of (a) monolayer and (b) bilayer  $\text{Bi}_2\text{O}_2\text{Se}$ .

**Table S3.** Calculated bader charges for monolayer and bilayer Bi<sub>2</sub>O<sub>2</sub>Se.

| Monolayer |          | charge/ <i>e</i> | ZVAL  | valence |
|-----------|----------|------------------|-------|---------|
|           | Bi       | 13.34            | 15.00 | 1.66    |
|           | O        | 7.17             | 6.00  | -1.17   |
|           | Se       | 6.42             | 6.00  | -0.42   |
|           | H        | 1.07             | 1.00  | -0.07   |
| Bilayer   |          |                  |       |         |
|           | outer Bi | 13.35            | 15.00 | 1.65    |
|           | inner Bi | 13.37            | 15.00 | 1.63    |
|           | O        | 7.16             | 6.00  | -1.16   |
|           | outer Se | 6.42             | 6.00  | -0.42   |
|           | inner Se | 6.95             | 6.00  | -0.95   |
|           | H        | 1.07             | 1.00  | -0.07   |

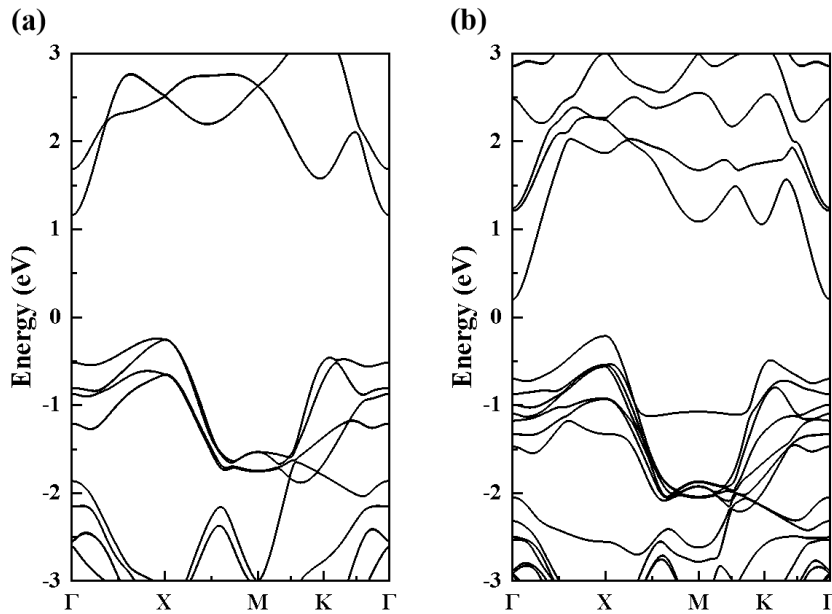

**Figure S5.** Band structures of (a) monolayer and (b) bilayer Bi<sub>2</sub>O<sub>2</sub>Se with SOC.

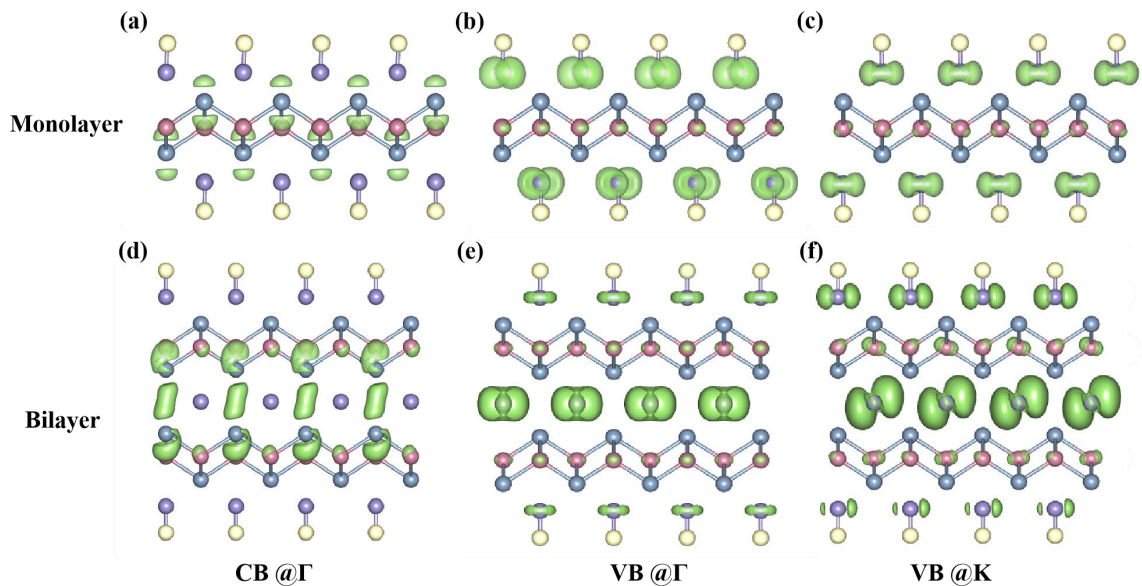

**Figure S6.** Partial charge density of monolayer and bilayer  $\text{Bi}_2\text{O}_2\text{Se}$  with SOC at the  $\Gamma$  point of the CBM, at the  $\Gamma$  point of the valence band and at the K point at the next highest position in the valence band.

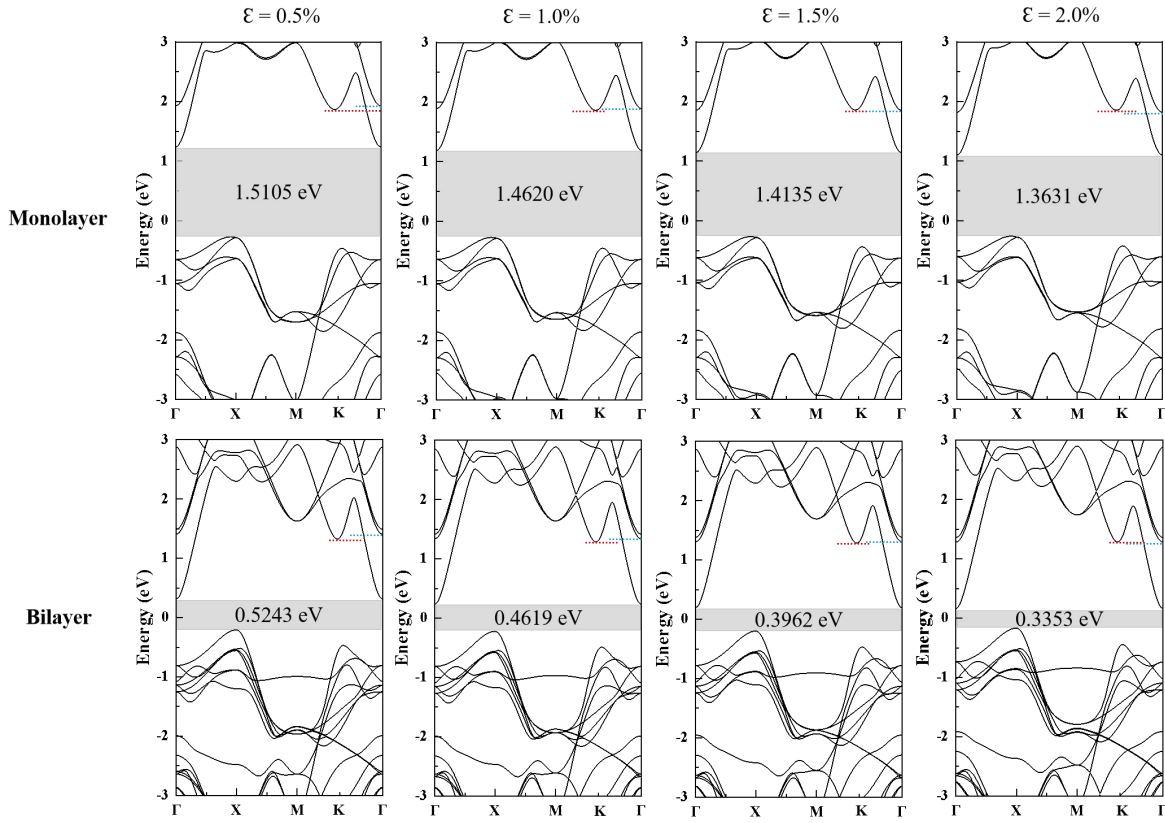

**Figure S7.** Band structures of monolayer and bilayer  $\text{Bi}_2\text{O}_2\text{Se}$  under 0.5, 1.0, 1.5, 2% strain calculated by DFT.
